# Supplementary material for: Synthesis of bimetal MOFs for rapid removal of doxorubicin in water by advanced oxidation method
Source: Royal Society of Chemistry journal article supplement (doi:10.1039/d2ra06623h), 2022-01-01
Supplement: d2ra06623h1.pdf [file d2ra06623h1.pdf]

## Supporting Information

### Synthesis of Bimetal MOFs for Rapid Removal of Doxorubicin in Water by Advanced Oxidation Method

Junhao Hu<sup>a,1</sup>, Qiong Yi<sup>a,1</sup>, Ziyi Xiao<sup>a</sup>, Feng Tian<sup>a</sup>, Tingting Shu<sup>a</sup>, Xiaolan Liu<sup>a</sup>, Yingxi Wang<sup>a</sup>, Ling Li<sup>a,\*</sup>, Jiangang Zhou<sup>b,\*</sup>

<sup>a</sup> Ministry-of-Education Key Laboratory for the Synthesis and Application of Organic Function Molecules, Hubei University, 430062, People's Republic of China

<sup>b</sup> Faculty of Resources and Environmental Science, Hubei University, 430062, People's Republic of China

## Content

|                                                                        |     |
|------------------------------------------------------------------------|-----|
| Figure S1 Doxorubicin working curve                                    | S-2 |
| Figure S2 SEM image of Co/Cu-MOFs                                      | S-2 |
| Figure S3 N <sub>2</sub> adsorption-desorption isotherms of Co/Cu-MOFs | S-3 |
| Figure S4 EIS of different materials                                   | S-3 |
| Figure S5 DLS of Co/Cu-MOFs-3 at 24 hour intervals                     | S-4 |
| Figure S6 FT-IR and XRD spectra of Co/Cu-MOFs-3 before and after use   | S-4 |
| Figure S7 Mass spectrometry analysis of solutions                      | S-5 |

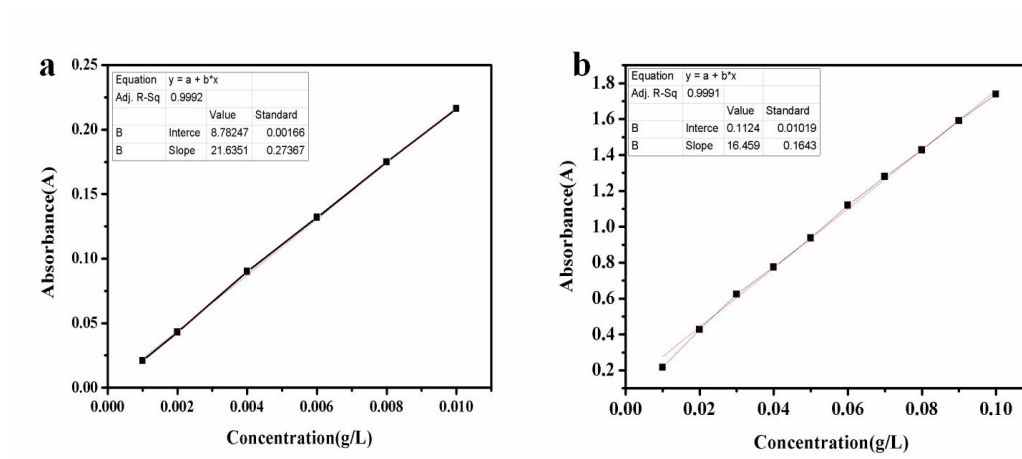

**Figure S1** Doxorubicin working curve

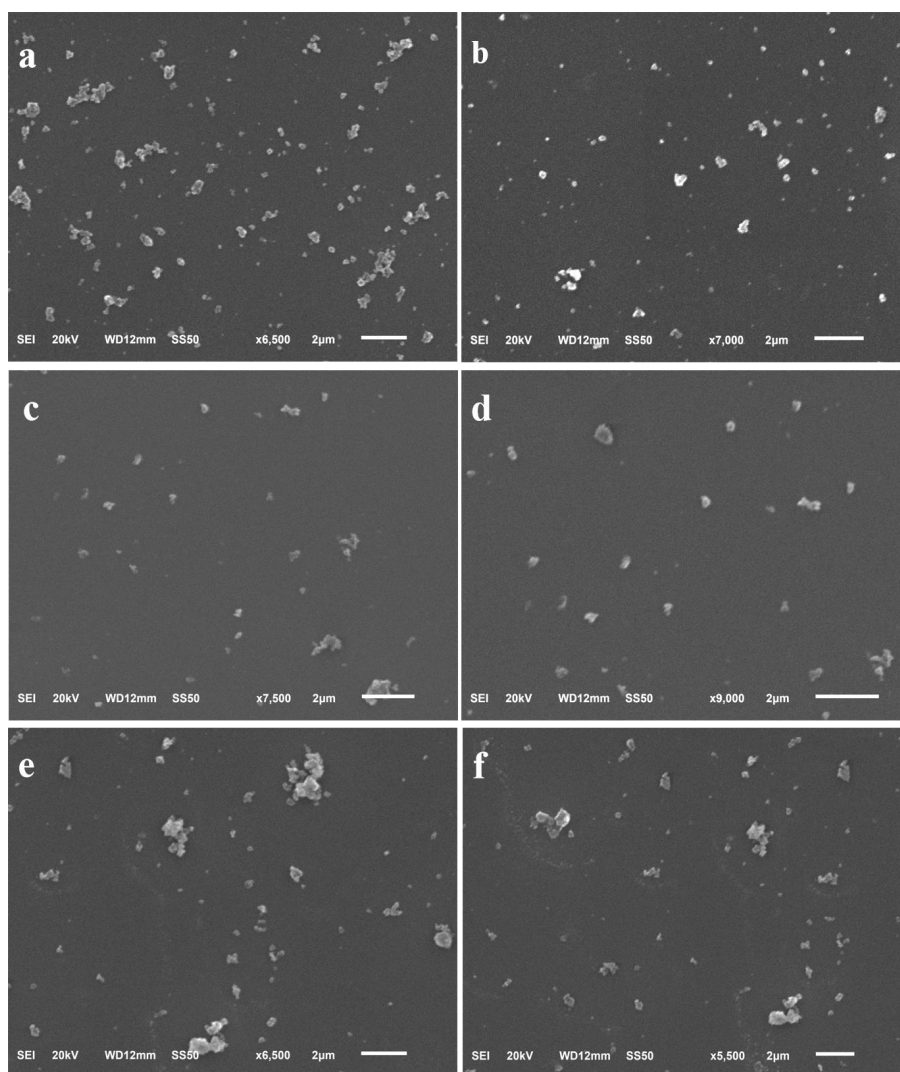

**Figure S2** SEM image of Co/Cu-MOFs. a)Co/Cu-MOFs-1; b)Co/Cu-MOFs-2;  
c)Co/Cu-MOFs-4; d)Co/Cu-MOFs-5; e)Co/Cu-MOFs-6; f)Co/Cu-MOFs-6

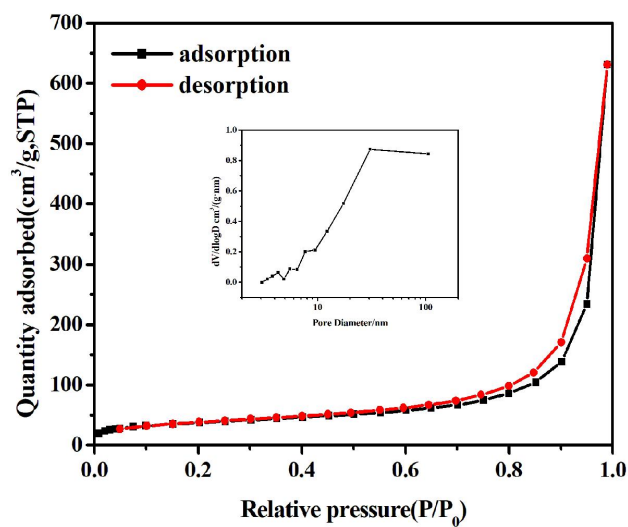

**Figure S3**  $\text{N}_2$  adsorption-desorption isotherms of Co/Cu-MOFs-3

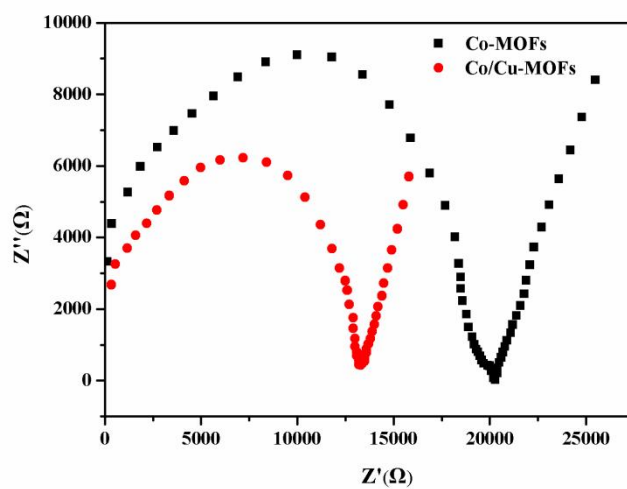

**Figure S4** EIS of Co-MOFs and Co/Cu-MOFs

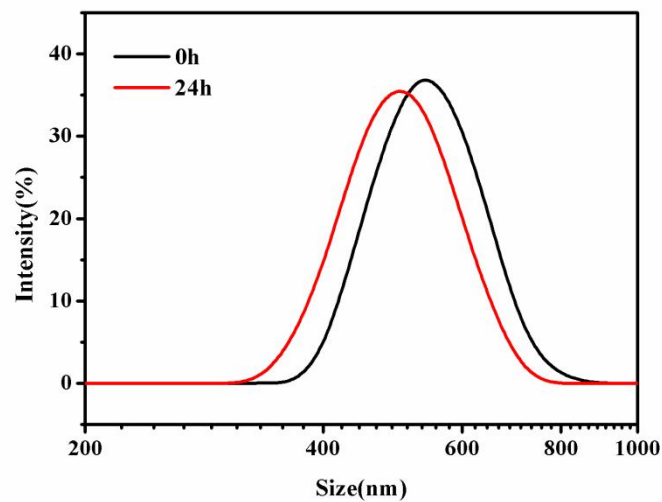

**Figure S5** DLS of Co/Cu-MOFs-3 at 24 hour intervals

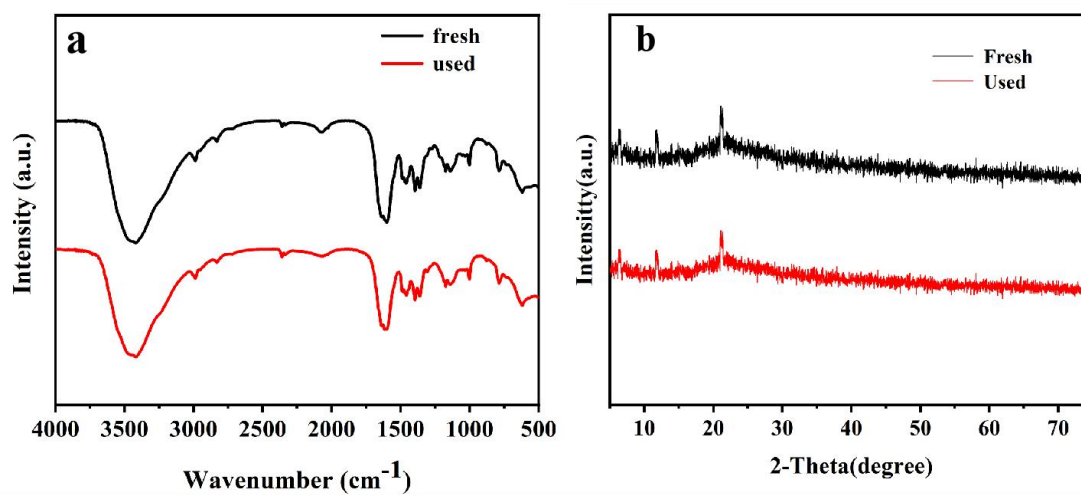

**Figure S6** (a)FT-IR spectra and(b)XRD spectra of Co/Cu-MOFs-3 before and after use

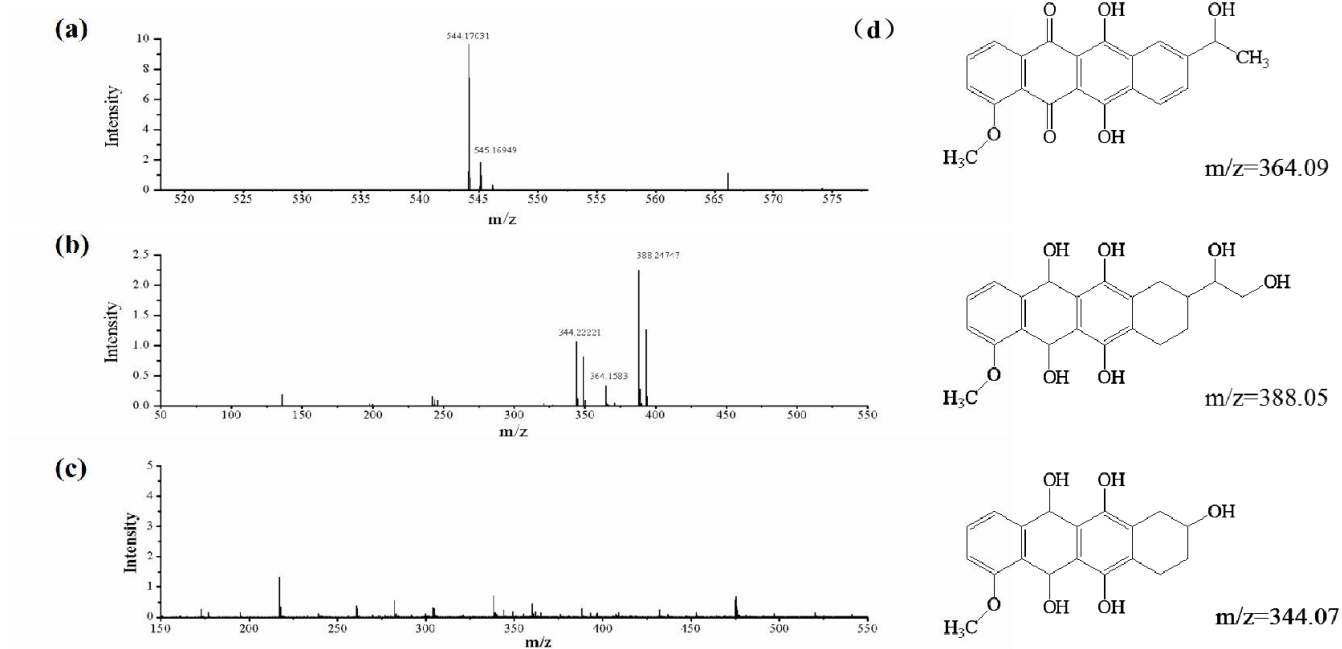

**Figure S7** Mass spectrometry analysis of solutions in different degradation process.

(a) Before degradation reaction. (b) During the degradation reaction. (c) The degradation process is over. (d) The chemical structure of massive species (m/z > 300).

**Table S1** Different conditions for the controlled synthesis of Co/Cu-MOFs

| Sample no.   | Cu <sup>2+</sup><br>(mmol) | Adenine<br>(mmol) | Temperature<br>(°C) | Time (h) |
|--------------|----------------------------|-------------------|---------------------|----------|
| Co/Cu-MOFs-1 | 0.32                       | 0.08              | 120                 | 24       |
| Co/Cu-MOFs-2 | 0.30                       | 0.10              | 120                 | 24       |
| Co/Cu-MOFs-3 | 0.27                       | 0.13              | 120                 | 24       |
| Co/Cu-MOFs-4 | 0.20                       | 0.20              | 120                 | 24       |
| Co/Cu-MOFs-5 | 0.13                       | 0.27              | 120                 | 24       |
| Co/Cu-MOFs-6 | 0.10                       | 0.30              | 120                 | 24       |
| Co/Cu-MOFs-7 | 0.08                       | 0.32              | 120                 | 24       |
